# Supplementary material for: Detecting neural assemblies in calcium imaging data
Source: PubMed Central journal article supplement (PMC6262979; doi:10.1186/s12915-018-0606-4), 2018-11-28
Supplement: 12915_2018_606_MOESM2_ESM.pdf [file 12915_2018_606_MOESM2_ESM.pdf]

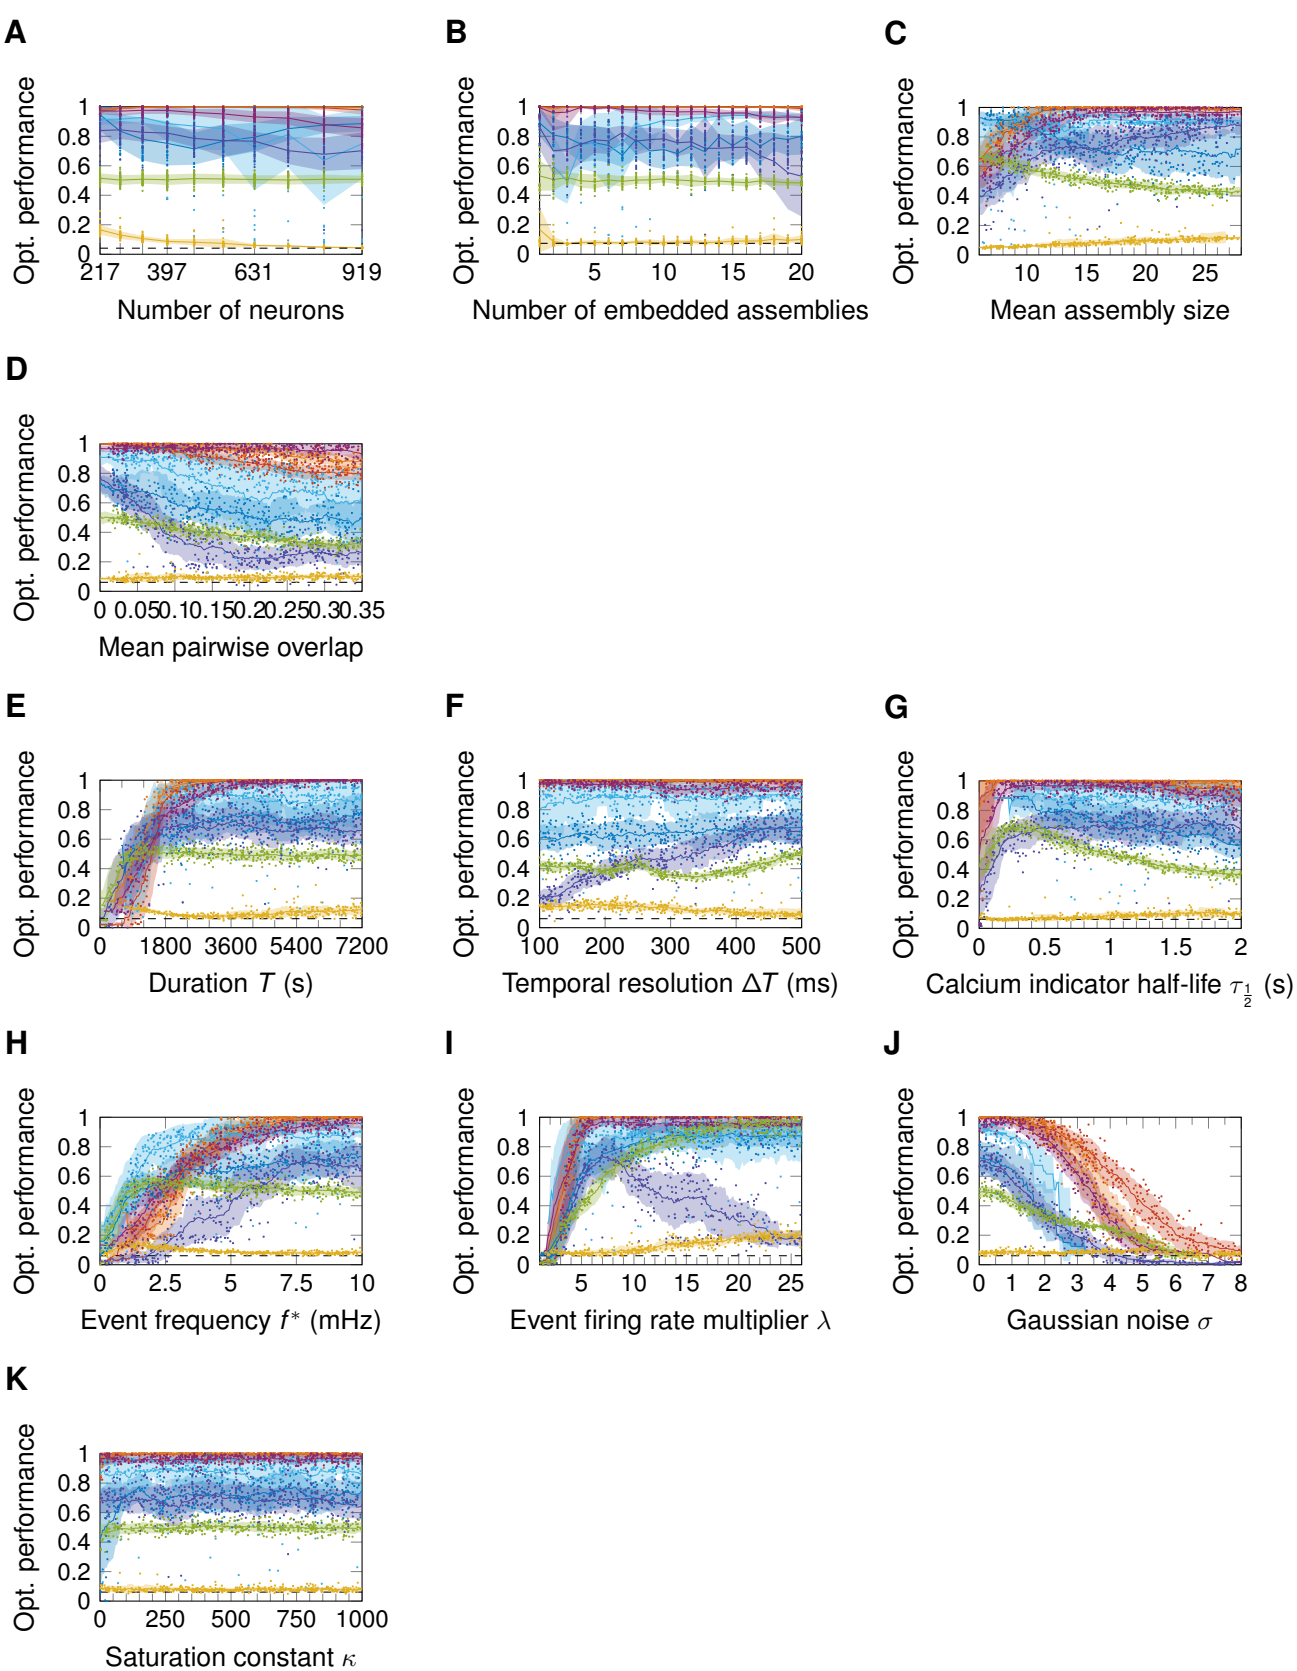

**Algorithm:** ● ICA-CS | ● Promax-MP | ● CORE | ● SVD | ● SGC | ● FIM-X  
 ● ICA-MP | ● Promax-CS
